# Supplementary material
Source: PubMed Central journal article supplement (PMC487899)

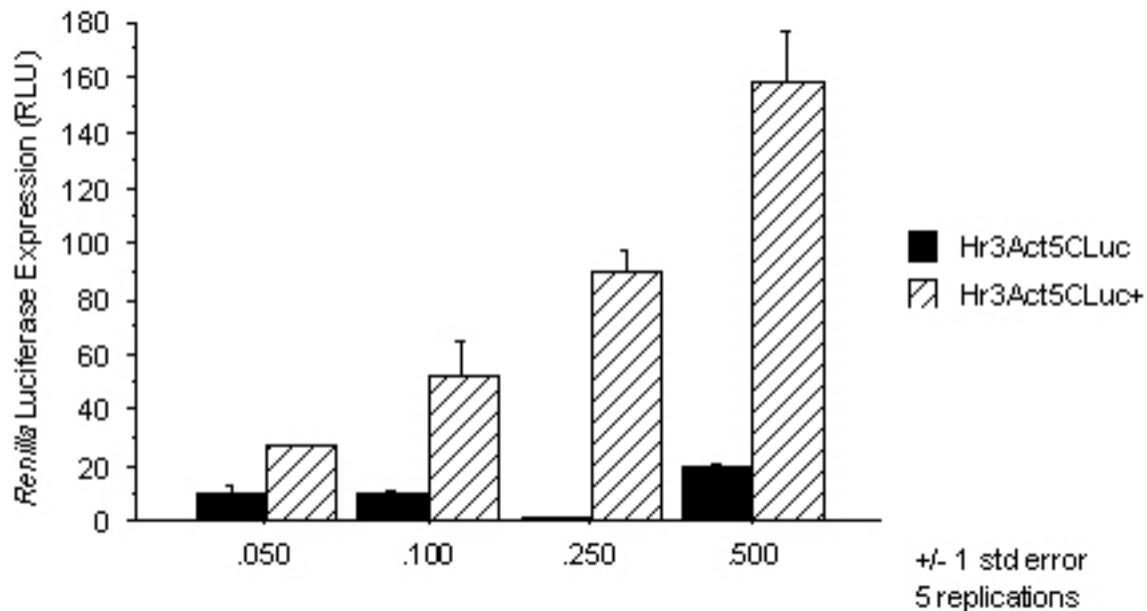

Supplement: 1471-2199-5-8-S1.pdf [file 1471-2199-5-8-S1.pdf]

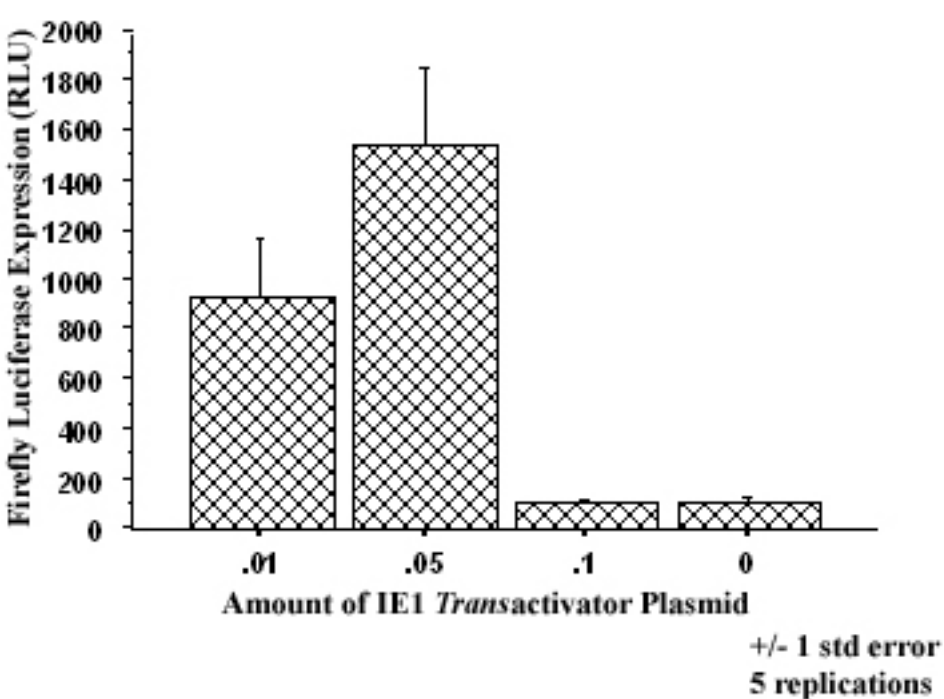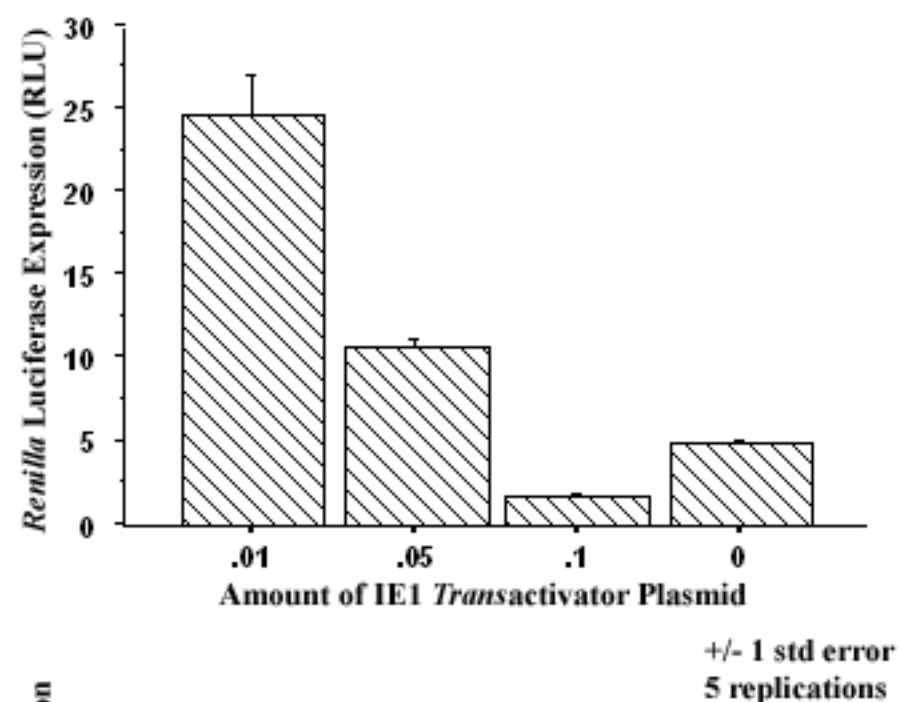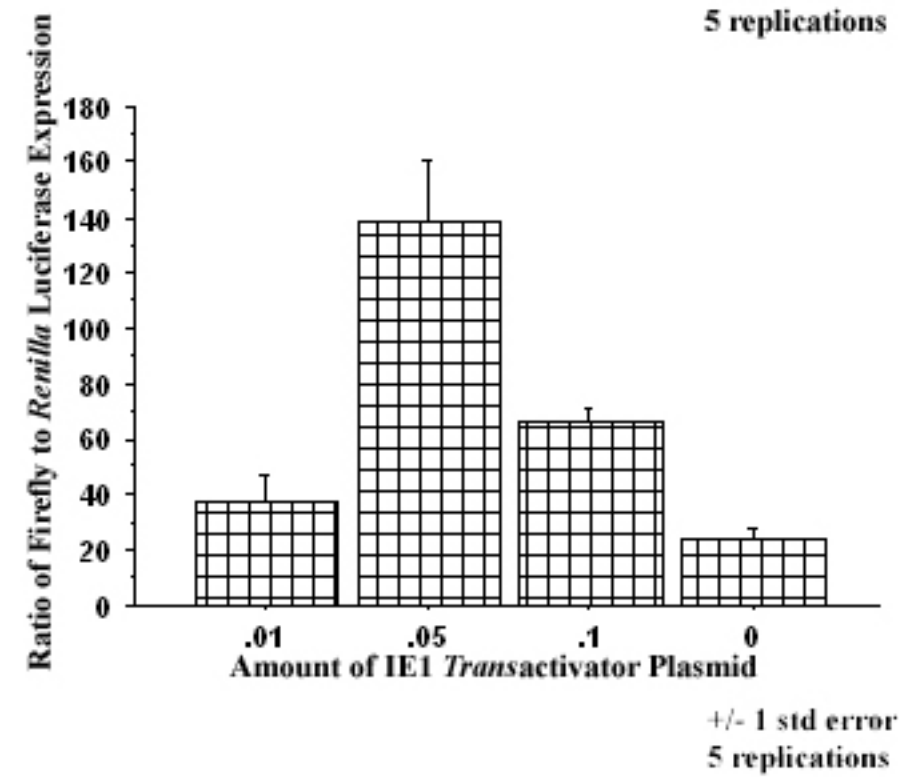

Supplement: 1471-2199-5-8-S2.pdf [file 1471-2199-5-8-S2.pdf]

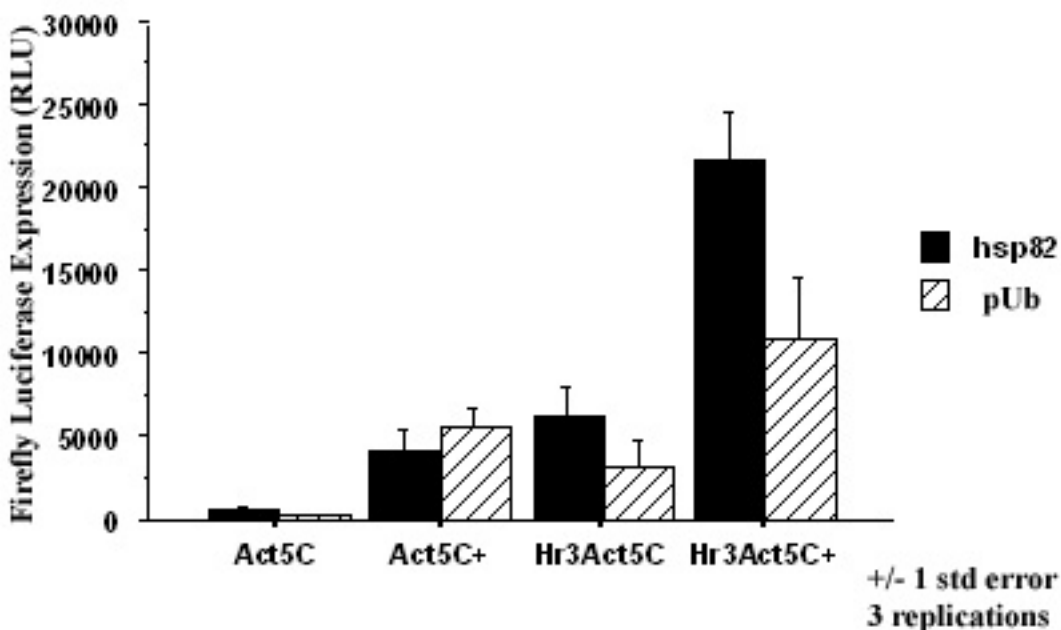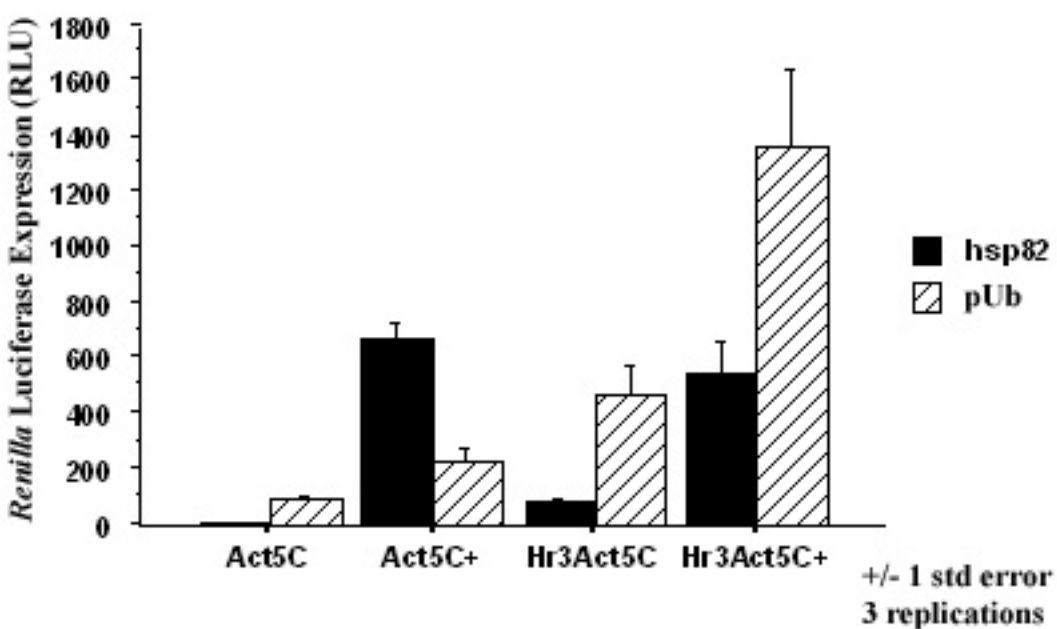

Supplement: 1471-2199-5-8-S3.pdf [file 1471-2199-5-8-S3.pdf]
